# Supplementary material
Source: Springer Nature journal article supplement (https://www.springermedizin.de/resource/supplementary/13020_2011_131_MOESM3_ESM.pdf/9641040)

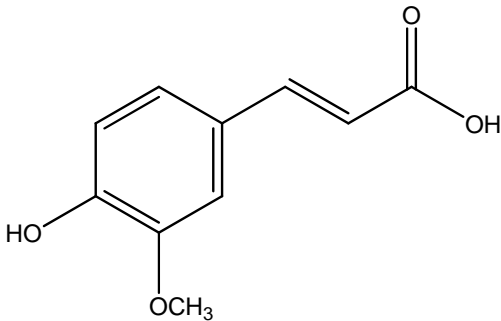

Ferulic acid

Supplement: MOESM3 [file 9641040]
